# Supplementary material for: Body size and weight change over adulthood and risk of breast cancer by menopausal and hormone receptor status: a pooled analysis of 20 prospective cohort studies
Source: PubMed Central journal article supplement (PMC7847460; doi:10.1007/s10654-020-00688-3), 2020-10-30
Supplement: 10654_2020_688_MOESM1_ESM.pdf [file 10654_2020_688_MOESM1_ESM.pdf]

**SUPPLEMENTARY MATERIALS to:**

**P.A. van den Brandt et al. “Body size and weight change over adulthood and risk of breast cancer by menopausal and hormone receptor status: a pooled analysis of 20 prospective cohort studies”**

European Journal of Epidemiology 2020

**Supplementary Table S1.** Number of breast cancer cases and hormone receptor subtypes in the cohort studies included in the pooled analyses of anthropometry and breast cancer risk by estrogen receptor (ER) and progesterone receptor (PR) status, Pooling Project of Prospective Studies of Diet and Cancer.

**Supplementary Table S2.** Pooled multivariable-adjusted RRs with 95% CIs of pre- and postmenopausal breast cancer for height, by hormone receptor subtype.

**Supplementary Table S3.** Pooled multivariable-adjusted RRs with 95% CIs of pre- and postmenopausal breast cancer for baseline BMI, by hormone receptor subtype.

**Supplementary Table S4.** Pooled multivariable-adjusted RRs with 95% CIs of pre- and postmenopausal breast cancer for early adult BMI (at age 18-20 years) by hormone receptor subtype early adult BMI (at age 18-20 years).

**Supplementary Table S5.** Pooled multivariable-adjusted RRs with 95% CIs of pre- and postmenopausal breast cancer for adult weight change between age 18-20 years and cohort baseline, by hormone receptor subtype early adult BMI (at age 18-20 years).

**Supplementary Table S6.** Pooled multivariable-adjusted RRs with 95% CIs of pre- and postmenopausal breast cancer for adult weight change between age 18-20 years and cohort baseline, stratified by BMI at age 18-20 years.

**Supplementary Table S7.** Funding and acknowledgements for individual cohorts.

**Table S1. Number of breast cancer cases and hormone receptor subtypes in the cohort studies included in the pooled analyses of anthropometry and breast cancer risk by estrogen receptor (ER) and progesterone receptor (PR) status, Pooling Project of Prospective Studies of Diet and Cancer**

| Study (country)                                                      | Acronym  | Baseline cohort size* | Years of follow-up | Breast cancer cases |               |              |               |              |               |              |            |              |
|----------------------------------------------------------------------|----------|-----------------------|--------------------|---------------------|---------------|--------------|---------------|--------------|---------------|--------------|------------|--------------|
|                                                                      |          |                       |                    | Total               | ER+           | ER-          | PR+           | PR-          | ER+PR+        | ER+PR-       | ER-PR+     | ER-PR-       |
| Beta-Carotene and Retinol Efficacy Trial (USA)                       | CARET    | 5,939                 | 1985-2005          | 363                 | 190           | 31           | 161           | 47           | 158           | 21           | 3          | 26           |
| Breast Cancer Detection Demonstration Project Follow-up Study (USA)  | BCDDP    | 38,846                | 1987-1999          | 1219                | 747           | 157          | 631           | 254          | 600           | 127          | 30         | 124          |
| California Teachers Study (USA)                                      | CTS      | 96,416                | 1995-2003          | 2579                | 1848          | 327          | 1472          | 600          | 1441          | 303          | 28         | 296          |
| Canadian National Breast Screening Study (Canada)                    | CNBSS    | 44,671                | 1980-2000          | 1228                | 362           | 125          | 305           | 139          | 268           | 47           | 21         | 76           |
| Cancer Prevention Study II Nutrition Cohort (USA)                    | CPSII    | 72,999                | 1992-2003          | 2952                | 1805          | 320          | 1454          | 555          | 1413          | 279          | 36         | 270          |
| CLUE II : Campaign Against Cancer and Heart Disease (USA)            | CLUE II  | 8,263                 | 1989-2007          | 287                 | 198           | 49           | 168           | 77           | 159           | 37           | 9          | 40           |
| Iowa Women's Health Study (USA)                                      | IWHS     | 34,536                | 1986-2004          | 1848                | 1328          | 238          | 1117          | 387          | 1082          | 190          | 34         | 196          |
| Japan Public Health Center-Based Prospective Study 1 (Japan)         | JPHC1    | 21,468                | 1990-2004          | 288                 | 111           | 69           | 87            | 82           | 74            | 30           | 13         | 52           |
| Melbourne Collaborative Cohort Study (Australia)                     | MCCS     | 22,429                | 1990-2006          | 799                 | 493           | 171          | 420           | 240          | 393           | 96           | 26         | 144          |
| Multiethnic Cohort (USA)                                             | MEC      | 90,394                | 1993-2004          | 3261                | 2129          | 539          | 1738          | 760          | 1669          | 300          | 69         | 460          |
| Netherlands Cohort Study (Netherlands)                               | NLCS     | 62,573                | 1986-1999          | 1959                | 679           | 177          | 351           | 188          | 338           | 94           | 13         | 92           |
| New York University Women's Health Study (USA)                       | NYUWHS   | 13,147                | 1985-2003          | 912                 | 388           | 120          | 293           | 202          | 269           | 110          | 24         | 91           |
| NIH-AARP Diet and Health Study (USA)                                 | NIH-AARP | 192,423               | 1995-2003          | 5768                | 2241          | 448          | 1850          | 759          | 1788          | 368          | 54         | 390          |
| Nurses' Health Study (a) (USA)                                       | NHSa     | 88,024                | 1980-1986          | 1113                | 523           | 254          | 387           | 302          | 343           | 103          | 33         | 185          |
| Nurses' Health Study (b) (USA) †                                     | NHSb     | 66,814                | 1986-2006          | 4358                | 2995          | 742          | 2410          | 1251         | 2296          | 582          | 95         | 626          |
| Nurses' Health Study II (USA)                                        | NHS II   | 90,922                | 1991-2003          | 1289                | 821           | 292          | 743           | 355          | 689           | 115          | 48         | 229          |
| Hormones and Diet in the Etiology of Breast Cancer (Italy)           | ORDET    | 8,958                 | 1987-2002          | 280                 | 204           | 66           | 178           | 91           | 157           | 46           | 19         | 45           |
| Prostate, Lung, Colorectal, and Ovarian Cancer Screening Trial (USA) | PLCO     | 27,992                | 1993-2007          | 1082                | 850           | 137          | 751           | 226          | 743           | 100          | 8          | 126          |
| Swedish Mammography Cohort (Sweden)                                  | SMC      | 58,668                | 1987-2005          | 2508                | 1549          | 371          | 1257          | 654          | 1151          | 386          | 103        | 266          |
| Women's Health Study (USA)                                           | WHS      | 37,568                | 1993-2004          | 1161                | 927           | 182          | 808           | 284          | 786           | 124          | 22         | 160          |
| Women's Lifestyle and Health Study (Sweden)                          | WLHS     | 45,679                | 1991-2006          | 1043                | 715           | 189          | 593           | 300          | 554           | 150          | 39         | 149          |
| <b>Total</b>                                                         |          | <b>1,061,915</b>      |                    | <b>36,297</b>       | <b>21,103</b> | <b>5,004</b> | <b>17,174</b> | <b>7,753</b> | <b>16,371</b> | <b>3,608</b> | <b>727</b> | <b>4,043</b> |

\*Cohort size after applying study-specific exclusion criteria and then excluding women with previous cancer diagnosis (other than nonmelanoma skin cancer); the Netherlands Cohort Study was analyzed as a case-cohort study and the above exclusions were not applied to its baseline cohort size.

† Nurses' Health Study (b) is not included as part of total cohort size because they are included in Nurses' Health Study (a). See Methods for further explanation.

**Table S2. Pooled multivariable-adjusted relative risks (RRs)\* with (95% confidence intervals, CIs) of breast cancer for height by estrogen receptor (ER) and progesterone receptor (PR) status, in the Pooling Project of Prospective Studies of Diet and Cancer**

| Breast cancer subtype | Number of cases | Category of height (m)- RRs (95%CIs) |             |                  |                  |                  |                    |             | P-value, test for trend | P-value, test for between-studies heterogeneity, highest category | P-value, test for common effects by receptor status, highest category | Continuous height (per 5 cm)                    |                                                             |  |
|-----------------------|-----------------|--------------------------------------|-------------|------------------|------------------|------------------|--------------------|-------------|-------------------------|-------------------------------------------------------------------|-----------------------------------------------------------------------|-------------------------------------------------|-------------------------------------------------------------|--|
|                       |                 | < 1.55                               | 1.55- <1.60 | 1.60-<1.65       | 1.65-<1.70       | 1.70-<1.75       | ≥1.75              | RRs (95%CI) |                         |                                                                   |                                                                       | P-value, test for between-studies heterogeneity | P-value, test for common effects by hormone receptor status |  |
| <b>Premenopausal</b>  |                 |                                      |             |                  |                  |                  |                    |             |                         |                                                                   |                                                                       |                                                 |                                                             |  |
| Overall               | 3845            | 1.04 (0.90-1.21)                     | 1           | 1.04 (0.93-1.17) | 1.16 (1.03-1.31) | 1.24 (1.09-1.41) | 1.33 (1.12-1.59)¶¶ | <0.001      | 0.370                   |                                                                   | 1.07 (1.04-1.10)¶¶                                                    | 0.393                                           |                                                             |  |
| ER+                   | 2124            | 1.05 (0.85-1.30)                     | 1           | 1.07 (0.91-1.25) | 1.13 (0.96-1.32) | 1.24 (1.04-1.48) | 1.37 (1.10-1.70)   | 0.062       | 0.850                   |                                                                   | 1.05 (1.01-1.10)                                                      | 0.154                                           |                                                             |  |
| ER-                   | 833             | 1.06 (0.74-1.53)                     | 1           | 1.12 (0.84-1.50) | 1.28 (0.99-1.65) | 1.33 (1.00-1.77) | 1.44 (1.00-2.08)   | 0.005       | 0.476                   | 0.812†                                                            | 1.08 (1.02-1.14)                                                      | 0.449                                           | 0.470†                                                      |  |
| PR+                   | 2000            | 1.09 (0.87-1.36)                     | 1           | 1.15 (0.97-1.36) | 1.20 (1.02-1.42) | 1.29 (1.07-1.55) | 1.52 (1.22-1.90)   | 0.012       | 0.770                   |                                                                   | 1.07 (1.03-1.12)                                                      | 0.214                                           |                                                             |  |
| PR-                   | 830             | 1.16 (0.84-1.59)                     | 1           | 1.01 (0.79-1.31) | 1.15 (0.89-1.48) | 1.22 (0.93-1.60) | 1.16 (0.81-1.68)   | 0.312       | 0.978                   | 0.220‡                                                            | 1.03 (0.97-1.09)                                                      | 0.374                                           | 0.004‡                                                      |  |
| ER+PR+                | 1741            | 1.09 (0.85-1.41)                     | 1           | 1.11 (0.93-1.33) | 1.15 (0.96-1.37) | 1.22 (1.00-1.48) | 1.41 (1.11-1.78)   | 0.011       | 0.948                   |                                                                   | 1.06 (1.02-1.11)                                                      | 0.390                                           |                                                             |  |
| ER+PR-                | 190             | 1.26 (0.42-3.74)                     | 1           | 1.09 (0.62-1.90) | 1.15 (0.59-2.22) | 1.08 (0.60-1.93) | 1.07 (0.47-2.39)   | 0.859       | 0.525                   |                                                                   | 1.00 (0.90-1.12)                                                      | 0.712                                           |                                                             |  |
| ER-PR-                | 513             | 1.11 (0.74-1.65)                     | 1           | 0.97 (0.70-1.34) | 1.15 (0.84-1.58) | 1.15 (0.80-1.63) | 1.23 (0.77-1.97)   | 0.498       | 0.589                   | 0.741§                                                            | 1.03 (0.93-1.14)                                                      | 0.080                                           | 0.595§                                                      |  |
| <b>Postmenopausal</b> |                 |                                      |             |                  |                  |                  |                    |             |                         |                                                                   |                                                                       |                                                 |                                                             |  |
| Overall               | 25618           | 0.94 (0.88-1.00)                     | 1           | 1.07 (1.03-1.12) | 1.14 (1.09-1.21) | 1.20 (1.14-1.26) | 1.27 (1.18-1.36)** | <0.001      | 0.802                   |                                                                   | 1.06 (1.05-1.08)**                                                    | 0.313                                           |                                                             |  |
| ER+                   | 14792           | 0.93 (0.86-1.01)                     | 1           | 1.09 (1.02-1.17) | 1.17 (1.08-1.26) | 1.24 (1.14-1.34) | 1.36 (1.24-1.48)   | <0.001      | 0.843                   |                                                                   | 1.08 (1.06-1.09)                                                      | 0.420                                           |                                                             |  |
| ER-                   | 3137            | 0.96 (0.82-1.12)                     | 1           | 1.03 (0.90-1.17) | 1.10 (0.95-1.27) | 1.17 (1.01-1.34) | 1.22 (0.95-1.56)   | 0.012       | 0.218                   | 0.431†                                                            | 1.04 (1.01-1.07)                                                      | 0.861                                           | 0.024†                                                      |  |
| PR+                   | 11892           | 0.93 (0.85-1.02)                     | 1           | 1.09 (1.02-1.17) | 1.17 (1.07-1.27) | 1.28 (1.18-1.38) | 1.40 (1.27-1.54)   | <0.001      | 0.883                   |                                                                   | 1.09 (1.07-1.10)                                                      | 0.495                                           |                                                             |  |
| PR-                   | 5065            | 0.93 (0.83-1.04)                     | 1           | 1.04 (0.93-1.16) | 1.12 (0.99-1.25) | 1.12 (1.00-1.26) | 1.18 (1.01-1.38)   | 0.001       | 0.478                   | 0.075‡                                                            | 1.04 (1.02-1.06)                                                      | 0.865                                           | 0.001‡                                                      |  |
| ER+PR+                | 11462           | 0.94 (0.85-1.03)                     | 1           | 1.10 (1.02-1.19) | 1.17 (1.09-1.27) | 1.28 (1.18-1.39) | 1.42 (1.29-1.57)   | <0.001      | 0.644                   |                                                                   | 1.09 (1.07-1.10)                                                      | 0.711                                           |                                                             |  |
| ER+PR-                | 2374            | 0.89 (0.76-1.05)                     | 1           | 1.07 (0.93-1.22) | 1.13 (0.97-1.32) | 1.05 (0.89-1.24) | 1.23 (0.98-1.54)   | 0.011       | 0.634                   |                                                                   | 1.04 (1.01-1.08)                                                      | 0.896                                           |                                                             |  |
| ER-PR-                | 2547            | 0.97 (0.80-1.17)                     | 1           | 1.06 (0.89-1.26) | 1.10 (0.92-1.32) | 1.21 (1.03-1.41) | 1.23 (0.93-1.63)   | 0.013       | 0.221                   | 0.367§                                                            | 1.04 (1.01-1.07)                                                      | 0.637                                           | 0.006§                                                      |  |

\* Adjusted for ethnicity (Caucasian, African-American, Hispanic, Asian, others), family history of breast cancer (yes, no), personal history of benign breast disease (yes, no), alcohol consumption (non-drinkers, >0-<5, 5-<15, 15-<30, ≥30 g/d), smoking status (never, past, current), education (<high school, high school, >high school), physical activity (low, medium, high), age at menarche (<11, 11-12, 13-14, ≥15 yrs), baseline BMI (<23, 23-<25, 25-<30, ≥30 kg/m<sup>2</sup>), oral contraceptive use (never, ever), hormone replacement therapy (never, ever), energy intake (kcal/d, continuous), interaction between parity (0, 1-2, ≥3) and age of first birth (<30, ≥ 30 yrs); age at baseline in years and year of questionnaire return were included as stratification variables.

† P-value for test for differences between ER- and ER+ subtypes.

‡ P-value for test for differences between PR- and PR+ subtypes.

§ P-value for test for differences between ER+PR+, ER+PR-, and ER-PR- subtypes (ER-PR+ had insufficient case numbers).

¶¶ P-value for test for interaction by menopausal status, categorical exposure: 0.673; continuous: 0.750.

\*\* P-value for test for interaction by HRT use, categorical exposure: 0.994; continuous: 0.212.

**Table S3. Pooled multivariable-adjusted relative risks (RRs)\* with (95% confidence intervals, CIs) of breast cancer for baseline BMI by estrogen receptor (ER) and progesterone receptor (PR) status, in the Pooling Project of Prospective Studies of Diet and Cancer.**

| Breast cancer subtype                  | Number of cases | Category of baseline BMI (kg/m <sup>2</sup> )- RRs (95%CIs) |                  |                  |                  |                   |                    | P-value, test for trend | P-value, test for between-studies heterogeneity, highest category | P-value, test for common effects by receptor status, highest category | Continuous baseline BMI (per 5 kg/m <sup>2</sup> ) |                                                 |                                                             |
|----------------------------------------|-----------------|-------------------------------------------------------------|------------------|------------------|------------------|-------------------|--------------------|-------------------------|-------------------------------------------------------------------|-----------------------------------------------------------------------|----------------------------------------------------|-------------------------------------------------|-------------------------------------------------------------|
|                                        |                 | < 21                                                        | 21-<23           | 23-<25           | 25-<27           | 27-<30            | ≥30                |                         |                                                                   |                                                                       | RRs (95%CIs)                                       | P-value, test for between-studies heterogeneity | P-value, test for common effects by hormone receptor status |
| <b>Premenopausal</b>                   |                 |                                                             |                  |                  |                  |                   |                    |                         |                                                                   |                                                                       |                                                    |                                                 |                                                             |
| Overall                                | 3845            | 1                                                           | 1.06 (0.95-1.18) | 0.95 (0.84-1.08) | 0.95 (0.85-1.07) | 0.89 (0.79-1.01)  | 0.78 (0.64-0.93)** | <0.001                  | 0.100                                                             |                                                                       | 0.89 (0.85-0.92)**                                 | 0.711                                           |                                                             |
| ER+                                    | 2124            | 1                                                           | 1.02 (0.90-1.16) | 0.86 (0.73-1.02) | 0.94 (0.81-1.10) | 0.90 (0.76-1.06)  | 0.67 (0.53-0.84)   | <0.001                  | 0.195                                                             |                                                                       | 0.88 (0.83-0.92)                                   | 0.491                                           |                                                             |
| ER-                                    | 833             | 1                                                           | 1.15 (0.94-1.41) | 1.17 (0.94-1.45) | 1.10 (0.85-1.42) | 1.04 (0.78-1.39)  | 1.00 (0.75-1.34)   | 0.438                   | 0.611                                                             | 0.031†                                                                | ¶                                                  |                                                 |                                                             |
| PR+                                    | 2000            | 1                                                           | 1.04 (0.92-1.17) | 0.90 (0.75-1.07) | 0.98 (0.84-1.15) | 0.92 (0.77-1.09)  | 0.68 (0.57-0.82)   | <0.001                  | 0.793                                                             |                                                                       | 0.88 (0.84-0.93)                                   | 0.794                                           |                                                             |
| PR-                                    | 830             | 1                                                           | 1.14 (0.94-1.39) | 1.09 (0.75-1.59) | 1.04 (0.80-1.36) | 0.94 (0.71-1.25)  | 0.97 (0.65-1.46)   | 0.175                   | 0.131                                                             | 0.896‡                                                                | 0.93 (0.86-1.02)                                   | 0.383                                           | 0.288‡                                                      |
| ER+PR+                                 | 1741            | 1                                                           | 1.00 (0.88-1.15) | 0.86 (0.74-0.99) | 0.97 (0.82-1.14) | 0.90 (0.75-1.08)  | 0.68 (0.56-0.83)   | <0.001                  | 0.585                                                             |                                                                       | 0.88 (0.83-0.93)                                   | 0.825                                           |                                                             |
| ER+PR-                                 | 190             | 1                                                           | 1.15 (0.79-1.68) | 0.59 (0.36-0.95) | 1.02 (0.52-1.99) | 0.70 (0.38- 1.30) | 0.77 (0.40-1.47)   | 0.115                   | 0.698                                                             |                                                                       | 0.88 (0.70-1.09)                                   | 0.240                                           |                                                             |
| ER-PR-                                 | 513             | 1                                                           | 1.10 (0.85-1.42) | 1.29 (0.80-2.08) | 1.11 (0.80-1.54) | 0.99 (0.68-1.43)  | 1.19 (0.69-2.07)   | 0.885                   | 0.079                                                             | 0.163§                                                                | 0.98 (0.88-1.08)                                   | 0.393                                           | 0.231§                                                      |
| <b>Postmenopausal, never HRT users</b> |                 |                                                             |                  |                  |                  |                   |                    |                         |                                                                   |                                                                       |                                                    |                                                 |                                                             |
| Overall                                | 11334           | 1                                                           | 1.15 (1.06-1.25) | 1.23 (1.13-1.35) | 1.37 (1.26-1.49) | 1.58 (1.46-1.72)  | 1.61 (1.45-1.79)†† | <0.001                  | 0.156                                                             |                                                                       | ¶                                                  |                                                 |                                                             |
| ER+                                    | 6148            | 1                                                           | 1.15 (1.03-1.29) | 1.29 (1.16-1.44) | 1.43 (1.28-1.59) | 1.65 (1.46-1.85)  | 1.69 (1.50-1.90)   | <0.001                  | 0.367                                                             |                                                                       | ¶                                                  |                                                 |                                                             |
| ER-                                    | 1319            | 1                                                           | 1.29 (0.97-1.71) | 1.06 (0.81-1.38) | 1.34 (1.00-1.80) | 1.40 (1.04-1.89)  | 1.12 (0.88-1.42)   | 0.174                   | 0.502                                                             | 0.002†                                                                | 1.04 (0.98-1.10)                                   | 0.769                                           |                                                             |
| PR+                                    | 4727            | 1                                                           | 1.14 (1.00-1.29) | 1.34 (1.19-1.52) | 1.45 (1.28-1.64) | 1.74 (1.54-1.97)  | 1.95 (1.72-2.21)   | <0.001                  | 0.723                                                             |                                                                       | ¶                                                  |                                                 |                                                             |
| PR-                                    | 2278            | 1                                                           | 1.23 (1.04-1.45) | 1.10 (0.93-1.30) | 1.34 (1.13-1.58) | 1.40 (1.19-1.66)  | 1.07 (0.89-1.28)   | 0.464                   | 0.841                                                             | <0.001‡                                                               | ¶                                                  |                                                 |                                                             |
| ER+PR+                                 | 4549            | 1                                                           | 1.14 (0.98-1.33) | 1.31 (1.15-1.49) | 1.44 (1.24-1.67) | 1.67 (1.42-1.98)  | 1.90 (1.67-2.15)   | <0.001                  | 0.448                                                             |                                                                       | ¶                                                  |                                                 |                                                             |
| ER+PR-                                 | 1023            | 1                                                           | 1.17 (0.91-1.49) | 1.22 (0.96-1.56) | 1.33 (1.04-1.71) | 1.53 (1.19-1.96)  | 1.05 (0.80-1.37)   | 0.561                   | 0.971                                                             |                                                                       | ¶                                                  |                                                 |                                                             |
| ER-PR-                                 | 1081            | 1                                                           | 1.28 (0.95-1.73) | 0.99 (0.73-1.35) | 1.24 (0.97-1.59) | 1.27 (0.96-1.67)  | 1.03 (0.80-1.33)   | 0.778                   | 0.878                                                             | <0.001§                                                               | 1.01 (0.95-1.08)                                   | 0.867                                           |                                                             |
| <b>Postmenopausal, ever HRT users</b>  |                 |                                                             |                  |                  |                  |                   |                    |                         |                                                                   |                                                                       |                                                    |                                                 |                                                             |
| Overall                                | 12836           | 1                                                           | 1.05 (0.97-1.13) | 1.10 (1.01-1.19) | 1.09 (1.00-1.19) | 1.14 (1.05-1.24)  | 1.17 (1.09-1.25)   | <0.001                  | 0.421                                                             |                                                                       | 1.05 (1.02-1.08)                                   | 0.122                                           |                                                             |
| ER+                                    | 7932            | 1                                                           | 1.00 (0.92-1.09) | 1.07 (0.97-1.18) | 1.06 (0.95-1.17) | 1.12 (1.01-1.24)  | 1.16 (1.06-1.27)   | <0.001                  | 0.383                                                             |                                                                       | 1.05 (1.02-1.08)                                   | 0.309                                           |                                                             |
| ER-                                    | 1473            | 1                                                           | 0.95 (0.79-1.15) | 1.19 (0.99-1.43) | 1.12 (0.90-1.39) | 1.19 (0.98-1.45)  | 1.13 (0.92-1.39)   | 0.093                   | 0.982                                                             | 0.822†                                                                | 1.06 (1.00-1.12)                                   | 0.800                                           | 0.882†                                                      |
| PR+                                    | 6543            | 1                                                           | 0.98 (0.88-1.09) | 1.11 (0.98-1.25) | 1.07 (0.96-1.20) | 1.12 (1.02-1.23)  | 1.24 (1.10-1.40)   | <0.001                  | 0.173                                                             |                                                                       | 1.08 (1.05-1.11)                                   | 0.437                                           |                                                             |
| PR-                                    | 2470            | 1                                                           | 1.04 (0.90-1.19) | 1.08 (0.94-1.24) | 1.05 (0.90-1.21) | 1.09 (0.93-1.26)  | 0.97 (0.82-1.15)   | 0.718                   | 0.417                                                             | 0.021‡                                                                | 0.99 (0.94-1.04)                                   | 0.315                                           | 0.006‡                                                      |
| ER+PR+                                 | 6328            | 1                                                           | 0.98 (0.87-1.10) | 1.10 (0.97-1.25) | 1.07 (0.94-1.22) | 1.12 (1.01-1.24)  | 1.24 (1.10-1.40)   | <0.001                  | 0.183                                                             |                                                                       | 1.08 (1.05-1.11)                                   | 0.437                                           |                                                             |
| ER+PR-                                 | 1152            | 1                                                           | 1.13 (0.93-1.38) | 1.02 (0.83-1.25) | 1.03 (0.83-1.27) | 0.99 (0.79-1.24)  | 0.85 (0.66-1.08)   | 0.038                   | 0.810                                                             |                                                                       | 0.91 (0.85-0.98)                                   | 0.823                                           |                                                             |
| ER-PR-                                 | 1216            | 1                                                           | 0.97 (0.79-1.20) | 1.12 (0.89-1.42) | 1.13 (0.91-1.40) | 1.22 (0.98-1.53)  | 1.16 (0.92-1.46)   | 0.239                   | 0.971                                                             | 0.023§                                                                | 1.06 (1.00-1.13)                                   | 0.405                                           | < 0.001§                                                    |

\* Adjusted for ethnicity (Caucasian, African-American, Hispanic, Asian, others), family history of breast cancer (yes, no), personal history of benign breast disease (yes, no), alcohol consumption (non-drinkers, >0-<5, 5-<15, 15-<30, ≥30 g/d), smoking status (never, past, current), education (<high school, high school, >high school), physical activity (low, medium, high), age at menarche (<11, 11-12, 13-14, ≥15 yrs), height (<1.60, 1.60-<1.65, 1.65-<1.70, 1.70-<1.75, ≥1.75 m), oral contraceptive use (never, ever), energy intake (kcal/d, continuous), interaction between parity (0, 1-2, ≥3) and age of first birth (<30, ≥ 30 yrs); age at baseline in years and year of questionnaire return were included as stratification variables.

† P-value for test for differences between ER- and ER+ subtypes.

‡ P-value for test for differences between PR- and PR+ subtypes.

§ P-value for test for differences between ER+PR+, ER+PR-, and ER-PR- subtypes (ER-PR+ had insufficient case numbers).

¶ Continuous estimates not shown because of significant nonlinearity in splines regression.

\*\* P-value for test for interaction by menopausal status, categorical exposure: < 0.001; continuous: < 0.001.

†† P-value for test for interaction by HRT use, categorical exposure: < 0.001.

**Table S4. Pooled multivariable-adjusted relative risks (RRs)\* with (95% confidence intervals, CIs) of breast cancer for early adult BMI (at age 18-20 years) by estrogen receptor (ER) and progesterone receptor (PR) status, in the Pooling Project of Prospective Studies of Diet and Cancer.**

| Breast cancer subtype                  | Number of cases | Category of early adult BMI (kg/m <sup>2</sup> )- RRs (95% CIs) |          |                  |                  |                    | Continuous early adult BMI (per 5 kg/m <sup>2</sup> ) |                                                 |                                                     |                                                 |                                                     |        |
|----------------------------------------|-----------------|-----------------------------------------------------------------|----------|------------------|------------------|--------------------|-------------------------------------------------------|-------------------------------------------------|-----------------------------------------------------|-------------------------------------------------|-----------------------------------------------------|--------|
|                                        |                 | < 18.5                                                          | 18.5-<21 | 21-<23           | 23-<25           | ≥25                | RRs (95% CIs)                                         | P-value, test for between-studies heterogeneity | P-value, test for common effects by receptor status | P-value, test for between-studies heterogeneity | P-value, test for common effects by receptor status |        |
| <b>Premenopausal</b>                   |                 |                                                                 |          |                  |                  |                    |                                                       |                                                 |                                                     |                                                 |                                                     |        |
| Overall                                | 3132            | 1.02 (0.92-1.13)                                                | 1        | 0.88 (0.81-0.97) | 0.82 (0.72-0.93) | 0.62 (0.53-0.72)** | <0.001                                                | 0.574                                           |                                                     | 0.79 (0.74-0.84)**                              | 0.446                                               |        |
| ER+                                    | 1786            | 1.03 (0.90-1.18)                                                | 1        | 0.87 (0.76-1.00) | 0.86 (0.72-1.01) | 0.67 (0.54-0.82)   | <0.001                                                | 0.406                                           |                                                     | 0.83 (0.76-0.90)                                | 0.589                                               |        |
| ER-                                    | 667             | 1.01 (0.81-1.27)                                                | 1        | 0.85 (0.70-1.05) | 0.94 (0.73-1.22) | 0.65 (0.47-0.92)   | 0.010                                                 | 0.446                                           | 0.917†                                              | 0.78 (0.68-0.90)                                | 0.576                                               | 0.517† |
| PR+                                    | 1653            | 0.99 (0.86-1.14)                                                | 1        | 0.87 (0.75-1.02) | 0.82 (0.69-0.98) | 0.69 (0.54-0.88)   | <0.001                                                | 0.306                                           |                                                     | ¶                                               |                                                     |        |
| PR-                                    | 709             | 1.08 (0.87-1.33)                                                | 1        | 0.89 (0.73-1.08) | 0.98 (0.76-1.26) | 0.60 (0.43-0.84)   | 0.003                                                 | 0.595                                           | 0.510‡                                              | 0.79 (0.67-0.93)                                | 0.294                                               |        |
| ER+PR+                                 | 1476            | 1.01 (0.87-1.17)                                                | 1        | 0.86 (0.70-1.06) | 0.82 (0.67-0.99) | 0.72 (0.55-0.92)   | <0.001                                                | 0.306                                           |                                                     | 0.84 (0.76-0.92)                                | 0.493                                               |        |
| ER+PR-                                 | 188             | 1.00 (0.53-1.87)                                                | 1        | 0.80 (0.54-1.17) | 0.66 (0.31-1.44) | 0.60 (0.28-1.29)   | 0.059                                                 | 0.792                                           |                                                     | 0.79 (0.59-1.06)                                | 0.309                                               |        |
| ER-PR-                                 | 449             | 1.11 (0.85-1.46)                                                | 1        | 0.92 (0.72-1.18) | 1.03 (0.75-1.42) | 0.64 (0.43-0.97)   | 0.023                                                 | 0.690                                           | 0.854§                                              | 0.79 (0.62-1.01)                                | 0.130                                               | 0.875§ |
| <b>Postmenopausal, never HRT users</b> |                 |                                                                 |          |                  |                  |                    |                                                       |                                                 |                                                     |                                                 |                                                     |        |
| Overall                                | 8978            | 1.03 (0.96-1.11)                                                | 1        | 0.96 (0.91-1.02) | 0.89 (0.81-0.99) | 0.83 (0.76-0.90)†† | <0.001                                                | 0.829                                           |                                                     | 0.89 (0.85-0.92)††                              | 0.770                                               |        |
| ER+                                    | 4985            | 1.06 (0.97-1.15)                                                | 1        | 0.98 (0.91-1.05) | 0.91 (0.80-1.04) | 0.89 (0.80-1.00)   | 0.001                                                 | 0.579                                           |                                                     | 0.91 (0.87-0.96)                                | 0.792                                               |        |
| ER-                                    | 1098            | 0.98 (0.82-1.17)                                                | 1        | 0.84 (0.72-0.98) | 0.75 (0.57-0.97) | 0.71 (0.55-0.92)   | <0.001                                                | 0.518                                           | 0.117†                                              | 0.80 (0.70-0.91)                                | 0.178                                               | 0.066† |
| PR+                                    | 3795            | 1.07 (0.98-1.18)                                                | 1        | 0.99 (0.91-1.07) | 0.92 (0.80-1.07) | 0.94 (0.83-1.06)   | 0.021                                                 | 0.848                                           |                                                     | 0.93 (0.88-0.99)                                | 0.620                                               |        |
| PR-                                    | 1829            | 0.96 (0.84-1.11)                                                | 1        | 0.94 (0.84-1.06) | 0.76 (0.64-0.90) | 0.71 (0.58-0.87)   | 0.001                                                 | 0.444                                           | 0.020‡                                              | 0.84 (0.75-0.93)                                | 0.206                                               | 0.072‡ |
| ER+PR+                                 | 3633            | 1.08 (0.98-1.19)                                                | 1        | 1.00 (0.92-1.09) | 0.93 (0.79-1.08) | 0.94 (0.83-1.07)   | 0.034                                                 | 0.871                                           |                                                     | 0.93 (0.88-0.99)                                | 0.942                                               |        |
| ER+PR-                                 | 852             | 0.96 (0.78-1.18)                                                | 1        | 1.03 (0.87-1.22) | 0.86 (0.68-1.09) | 0.74 (0.50-1.10)   | 0.129                                                 | 0.128                                           |                                                     | 0.87 (0.77-0.99)                                | 0.495                                               |        |
| ER-PR-                                 | 906             | 0.94 (0.78-1.15)                                                | 1        | 0.85 (0.72-1.00) | 0.73 (0.53-1.00) | 0.70 (0.52-0.93)   | 0.010                                                 | 0.426                                           | 0.120§                                              | 0.81 (0.69-0.95)                                | 0.097                                               | 0.235§ |
| <b>Postmenopausal, ever HRT users</b>  |                 |                                                                 |          |                  |                  |                    |                                                       |                                                 |                                                     |                                                 |                                                     |        |
| Overall                                | 9884            | 0.98 (0.92-1.05)                                                | 1        | 0.94 (0.88-1.00) | 0.84 (0.77-0.90) | 0.78 (0.72-0.86)   | <0.001                                                | 0.469                                           |                                                     | 0.88 (0.84-0.92)                                | 0.337                                               |        |
| ER+                                    | 6194            | 0.97 (0.90-1.04)                                                | 1        | 0.96 (0.90-1.02) | 0.85 (0.77-0.94) | 0.80 (0.71-0.89)   | <0.001                                                | 0.690                                           |                                                     | ¶                                               |                                                     |        |
| ER-                                    | 1135            | 1.03 (0.85-1.25)                                                | 1        | 0.83 (0.71-0.96) | 0.70 (0.55-0.89) | 0.79 (0.54-1.14)   | 0.026                                                 | 0.083                                           | 0.950†                                              | 0.80 (0.66-0.98)                                | 0.010                                               |        |
| PR+                                    | 5064            | 1.00 (0.93-1.09)                                                | 1        | 0.96 (0.87-1.05) | 0.86 (0.77-0.95) | 0.83 (0.73-0.95)   | 0.001                                                 | 0.421                                           |                                                     | 0.89 (0.84-0.95)                                | 0.270                                               |        |
| PR-                                    | 1905            | 0.91 (0.77-1.07)                                                | 1        | 0.87 (0.78-0.98) | 0.67 (0.56-0.81) | 0.69 (0.56-0.86)   | 0.001                                                 | 0.491                                           | 0.136‡                                              | ¶                                               |                                                     |        |
| ER+PR+                                 | 4912            | 1.00 (0.92-1.08)                                                | 1        | 0.96 (0.87-1.06) | 0.85 (0.77-0.95) | 0.82 (0.72-0.95)   | 0.001                                                 | 0.358                                           |                                                     | 0.89 (0.84-0.95)                                | 0.256                                               |        |
| ER+PR-                                 | 894             | 0.81 (0.64-1.02)                                                | 1        | 0.91 (0.77-1.07) | 0.70 (0.54-0.92) | 0.65 (0.47-0.90)   | 0.035                                                 | 0.971                                           |                                                     | ¶                                               |                                                     |        |
| ER-PR-                                 | 959             | 1.01 (0.81-1.27)                                                | 1        | 0.83 (0.71-0.98) | 0.68 (0.52-0.88) | 0.72 (0.47-1.12)   | 0.031                                                 | 0.074                                           | 0.382§                                              | 1.10 (1.03-1.18)                                | 0.140                                               |        |

\* Adjusted for ethnicity (Caucasian, African-American, Hispanic, Asian, others), family history of breast cancer (yes, no), personal history of benign breast disease (yes, no), alcohol consumption (non-drinkers, >0-<5, 5-<15, 15-<30, ≥30 g/d), smoking status (never, past, current), education (<high school, high school, >high school), physical activity (low, medium, high, missing), age at menarche (<11, 11-12, 13-14, ≥15 yrs), height (<1.60, 1.60-<1.65, 1.65-<1.70, 1.70-<1.75, ≥1.75 m), oral contraceptive use (never, ever), energy intake (kcal/d, continuous), interaction between parity (0,1-2, ≥3) and age of first birth (<30, ≥ 30 yrs); age at baseline in years and year of questionnaire return were included as stratification variables.

† P-value for test for differences between ER- and ER+ subtypes.

‡ P-value for test for differences between PR- and PR+ subtypes.

§ P-value for test for differences between ER+PR+, ER+PR-, and ER-PR- subtypes (ER-PR+ had insufficient case numbers).

¶ Continuous estimates not shown because of significant nonlinearity in splines regression.

\*\* P-value for test for interaction by menopausal status, categorical exposure: 0.002; continuous: 0.002.

†† P-value for test for interaction by HRT use, categorical exposure: 0.329; continuous: 0.618.

**Table S5. Pooled multivariable-adjusted relative risks (RRs)\* with (95% confidence intervals, CIs) of breast cancer for adult weight change between age 18-20 years and cohort baseline, by estrogen receptor (ER) and progesterone receptor (PR) status, in the Pooling Project of Prospective Studies of Diet and Cancer.**

| Breast cancer subtype                  | Number of cases | Category of adult weight change (kg) - RRs (95% CIs) |         |                  |                  |                    | Continuous adult weight change (per 10 kg) |                                                 |                                                                               |                  |                                                 |                                                             |
|----------------------------------------|-----------------|------------------------------------------------------|---------|------------------|------------------|--------------------|--------------------------------------------|-------------------------------------------------|-------------------------------------------------------------------------------|------------------|-------------------------------------------------|-------------------------------------------------------------|
|                                        |                 | < -2                                                 | -2 <- 2 | 2 <-10           | 10 <-20          | ≥20                | P-value, test for trend                    | P-value, test for between-studies heterogeneity | P-value, test for common effects by hormone receptor status, highest category | RRs (95% CI)     | P-value, test for between-studies heterogeneity | P-value, test for common effects by hormone receptor status |
| <b>Premenopausal</b>                   |                 |                                                      |         |                  |                  |                    |                                            |                                                 |                                                                               |                  |                                                 |                                                             |
| Overall                                | 3132            | 0.90 (0.77-1.05)                                     | 1       | 1.05(0.93-1.19)  | 1.07(0.94-1.22)  | 0.85 (0.69-1.05)** | 0.269                                      | 0.166                                           |                                                                               | ¶                |                                                 |                                                             |
| ER+                                    | 1786            | 0.89 (0.72-1.09)                                     | 1       | 1.01 (0.87-1.18) | 1.01 (0.85-1.20) | 0.76 (0.57-1.01)   | 0.208                                      | 0.199                                           |                                                                               | ¶                |                                                 |                                                             |
| ER-                                    | 667             | 1.05 (0.73-1.49)                                     | 1       | 1.09 (0.83-1.43) | 1.25 (0.94-1.67) | 1.07 (0.76-1.50)   | 0.556                                      | 0.818                                           | 0.131†                                                                        | 1.05 (0.98-1.13) | 0.591                                           |                                                             |
| PR+                                    | 1653            | 0.88(0.71-1.09)                                      | 1       | 1.05(0.89-1.23)  | 1.04(0.87-1.24)  | 0.79 (0.63-0.98)   | 0.196                                      | 0.730                                           |                                                                               | ¶                |                                                 |                                                             |
| PR-                                    | 709             | 0.92 (0.66-1.29)                                     | 1       | 1.06 (0.82-1.37) | 1.16 (0.88-1.53) | 0.90 (0.65-1.26)   | 0.922                                      | 0.661                                           | 0.501‡                                                                        | 1.04 (0.97-1.11) | 0.678                                           |                                                             |
| ER+PR+                                 | 1476            | 0.90 (0.71-1.13)                                     | 1       | 1.05(0.88-1.25)  | 1.03 (0.86-1.25) | 0.79 (0.61-1.03)   | 0.214                                      | 0.339                                           |                                                                               | ¶                |                                                 |                                                             |
| ER+PR-                                 | 188             | 0.67 (0.35-1.27)                                     | 1       | 0.93 (0.44-1.97) | 1.05 (0.58-1.88) | 0.45 (0.19-1.09)   | 0.287                                      | 0.321                                           |                                                                               | 0.98 (0.85-1.12) | 0.427                                           |                                                             |
| ER-PR-                                 | 449             | 1.13 (0.73-1.75)                                     | 1       | 1.29 (0.92-1.80) | 1.25 (0.86-1.80) | 1.22 (0.80-1.86)   | 0.646                                      | 0.649                                           | 0.045§                                                                        | 1.07 (0.95-1.21) | 0.135                                           |                                                             |
| <b>Postmenopausal, never HRT users</b> |                 |                                                      |         |                  |                  |                    |                                            |                                                 |                                                                               |                  |                                                 |                                                             |
| Overall                                | 8978            | 0.90 (0.75-1.06)                                     | 1       | 1.15(1.03-1.28)  | 1.42 (1.26-1.59) | 1.68(1.48-1.90)††  | < 0.001                                    | 0.256                                           |                                                                               | ¶                |                                                 |                                                             |
| ER+                                    | 4985            | 0.86 (0.69-1.09)                                     | 1       | 1.09 (0.95-1.25) | 1.38(1.20-1.58)  | 1.65 (1.42-1.91)   | < 0.001                                    | 0.385                                           |                                                                               | ¶                |                                                 |                                                             |
| ER-                                    | 1098            | 0.89 (0.56-1.43)                                     | 1       | 1.00 (0.74-1.35) | 1.28 (0.97-1.70) | 1.35 (1.01-1.81)   | 0.001                                      | 0.657                                           | 0.238†                                                                        | 1.10 (1.05-1.15) | 0.450                                           |                                                             |
| PR+                                    | 3795            | 0.88 (0.69-1.11)                                     | 1       | 1.11 (0.95-1.30) | 1.47 (1.26-1.72) | 1.88 (1.56-2.28)   | < 0.001                                    | 0.260                                           |                                                                               | ¶                |                                                 |                                                             |
| PR-                                    | 1829            | 0.83 (0.61-1.14)                                     | 1       | 0.99 (0.73-1.34) | 1.14 (0.87-1.49) | 1.13 (0.86-1.48)   | 0.002                                      | 0.181                                           | 0.002‡                                                                        | ¶                |                                                 |                                                             |
| ER+PR+                                 | 3633            | 0.89 (0.68-1.16)                                     | 1       | 1.10 (0.93-1.29) | 1.44 (1.23-1.69) | 1.93 (1.55-2.40)   | < 0.001                                    | 0.133                                           |                                                                               | ¶                |                                                 |                                                             |
| ER+PR-                                 | 852             | 0.85 (0.57-1.25)                                     | 1       | 1.13(0.84-1.53)  | 1.24(0.92-1.67)  | 1.17(0.86-1.61)    | 0.040                                      | 0.683                                           |                                                                               | ¶                |                                                 |                                                             |
| ER-PR-                                 | 906             | 0.90 (0.60-1.34)                                     | 1       | 0.97 (0.72-1.32) | 1.20 (0.89-1.63) | 1.25 (0.91-1.71)   | 0.011                                      | 0.869                                           | 0.014§                                                                        | 1.07 (1.01-1.13) | 0.627                                           |                                                             |
| <b>Postmenopausal, ever HRT users</b>  |                 |                                                      |         |                  |                  |                    |                                            |                                                 |                                                                               |                  |                                                 |                                                             |
| Overall                                | 9884            | 0.91 (0.82-1.01)                                     | 1       | 1.02 (0.94-1.10) | 1.08 (0.99-1.17) | 1.22 (1.12-1.33)   | < 0.001                                    | 0.484                                           |                                                                               | 1.09 (1.06-1.12) | 0.052                                           |                                                             |
| ER+                                    | 6194            | 0.90 (0.78-1.03)                                     | 1       | 1.00 (0.90-1.10) | 1.07 (0.96-1.18) | 1.22 (1.09-1.36)   | < 0.001                                    | 0.438                                           |                                                                               | 1.08 (1.05-1.11) | 0.190                                           |                                                             |
| ER-                                    | 1135            | 0.96 (0.68-1.34)                                     | 1       | 1.16 (0.89-1.50) | 1.25 (0.96-1.62) | 1.39 (1.06-1.83)   | 0.005                                      | 0.619                                           | 0.388†                                                                        | 1.12 (1.06-1.18) | 0.323                                           | 0.255†                                                      |
| PR+                                    | 5064            | 0.89 (0.76-1.03)                                     | 1       | 1.03 (0.92-1.15) | 1.08(0.96-1.21)  | 1.32 (1.17-1.50)   | < 0.001                                    | 0.489                                           |                                                                               | 1.10 (1.07-1.14) | 0.081                                           |                                                             |
| PR-                                    | 1905            | 0.99 (0.78-1.26)                                     | 1       | 1.04 (0.83-1.31) | 1.17 (0.97-1.41) | 1.09(0.89-1.34)    | 0.116                                      | 0.856                                           | 0.114‡                                                                        | 1.04 (1.00-1.08) | 0.546                                           | 0.021‡                                                      |
| ER+PR+                                 | 4912            | 0.89 (0.77-1.04)                                     | 1       | 1.02 (0.91-1.15) | 1.08 (0.96-1.22) | 1.32 (1.16-1.51)   | < 0.001                                    | 0.383                                           |                                                                               | 1.10(1.06-1.14)  | 0.067                                           |                                                             |
| ER+PR-                                 | 894             | 0.95 (0.69-1.31)                                     | 1       | 0.85 (0.66-1.10) | 1.02 (0.79-1.32) | 0.80 (0.60-1.07)   | 0.261                                      | 0.974                                           |                                                                               | 0.96 (0.91-1.02) | 0.911                                           |                                                             |
| ER-PR-                                 | 959             | 1.04(0.72-1.50)                                      | 1       | 1.21 (0.91-1.61) | 1.32 (0.99-1.77) | 1.46(1.08-1.97)    | 0.015                                      | 0.656                                           | 0.004§                                                                        | 1.10 (1.03-1.18) | 0.140                                           | <0.001§                                                     |

\* Adjusted for ethnicity (Caucasian, African-American, Hispanic, Asian, others), family history of breast cancer (yes, no), personal history of benign breast disease (yes, no), alcohol consumption (non-drinkers, >0-<5, 5-<15, 15-<30, ≥30 g/d), smoking status (never, past, current), education (<high school, high school, >high school), physical activity (low, medium, high, missing), age at menarche (<11, 11-12, 13-14, ≥15 yrs), height (<1.60, 1.60-<1.65, 1.65-<1.70, 1.70-<1.75, ≥1.75 m), oral contraceptive use (never, ever), energy intake (kcal/d, continuous), interaction between parity (0,1-2, ≥3) and age of first birth (<30, ≥ 30 yrs); age at baseline in years and year of questionnaire return were included as stratification variables.



† P-value for test for differences between ER- and ER+ subtypes.

‡ P-value for test for differences between PR- and PR+ subtypes.

§ P-value for test for differences between ER+PR+, ER+PR-, and ER-PR- subtypes (ER-PR+ had insufficient case numbers).

¶ Continuous estimates not shown because of significant nonlinearity in splines regression.

\*\* P-value for test for interaction by menopausal status, categorical exposure: < 0.001.

†† P-value for test for interaction by HRT use, categorical exposure: < 0.001.

Table S6. Pooled multivariable-adjusted relative risks (RRs)\* with (95% confidence intervals, CIs) of breast cancer for adult weight change between age 18-20 years and cohort baseline, stratified by BMI at age 18-20 years, in the Pooling Project of Prospective Studies of Diet and Cancer.

| Breast cancer subtype per stratum of early adult BMI (18-20y) | Cases | Category of adult weight change (kg) - RRs (95%CIs) |                     |                     |                     |                     | P-value, test for trend | P-value, test for interaction between BMI at 18-20y and adult weight change |
|---------------------------------------------------------------|-------|-----------------------------------------------------|---------------------|---------------------|---------------------|---------------------|-------------------------|-----------------------------------------------------------------------------|
|                                                               |       | < -2                                                | -2 <- 2             | 2-<10               | 10-<20              | ≥20                 |                         |                                                                             |
| <b>Premenopausal</b>                                          |       |                                                     |                     |                     |                     |                     |                         |                                                                             |
| <b>Total</b>                                                  |       |                                                     |                     |                     |                     |                     |                         |                                                                             |
| BMI18<21                                                      | 1943  | 0.96<br>(0.73-1.27)                                 | 1                   | 1.02<br>(0.88-1.18) | 1.03<br>(0.88-1.21) | 0.83<br>(0.68-1.02) | 0.113                   | 0.994                                                                       |
| BMI18≥21                                                      | 1189  | 0.75<br>(0.62-0.91)                                 | 0.84<br>(0.68-1.04) | 0.85<br>(0.72-1.01) | 0.86<br>(0.72-1.03) | 0.68<br>(0.56-0.83) | 0.256                   |                                                                             |
| <b>ER+</b>                                                    |       |                                                     |                     |                     |                     |                     |                         |                                                                             |
| BMI18<21                                                      | 1104  | 0.95<br>(0.66-1.36)                                 | 1                   | 1.00<br>(0.83-1.21) | 0.91<br>(0.74-1.12) | 0.77<br>(0.59-1.01) | 0.053                   | 0.363                                                                       |
| BMI18≥21                                                      | 682   | 0.73<br>(0.57-0.93)                                 | 0.84<br>(0.64-1.11) | 0.78<br>(0.62-0.97) | 0.93<br>(0.74-1.18) | 0.57<br>(0.43-0.75) | 0.057                   |                                                                             |
| <b>ER-</b>                                                    |       |                                                     |                     |                     |                     |                     |                         |                                                                             |
| BMI18<21                                                      | 413   | 1.23<br>(0.68-2.20)                                 | 1                   | 1.03<br>(0.74-1.44) | 1.31<br>(0.92-1.86) | 0.97<br>(0.62-1.50) | 0.852                   | 0.186                                                                       |
| BMI18≥21                                                      | 254   | 0.85<br>(0.56-1.28)                                 | 0.90<br>(0.56-1.45) | 0.95<br>(0.65-1.38) | 0.84<br>(0.56-1.28) | 0.98<br>(0.64-1.50) | 0.457                   |                                                                             |
| <b>Postmenopausal, never HRT users</b>                        |       |                                                     |                     |                     |                     |                     |                         |                                                                             |
| <b>Total</b>                                                  |       |                                                     |                     |                     |                     |                     |                         |                                                                             |
| BMI18<21                                                      | 5023  | 0.77<br>(0.59-1.01)                                 | 1                   | 1.19<br>(1.02-1.37) | 1.42<br>(1.23-1.65) | 1.79<br>(1.55-2.07) | <0.001                  | 0.018                                                                       |
| BMI18≥21                                                      | 3955  | 0.96<br>(0.81-1.13)                                 | 1.02<br>(0.85-1.23) | 1.17<br>(1.01-1.36) | 1.46<br>(1.26-1.70) | 1.59<br>(1.37-1.85) | <0.001                  |                                                                             |
| <b>ER+</b>                                                    |       |                                                     |                     |                     |                     |                     |                         |                                                                             |
| BMI18<21                                                      | 2781  | 0.65<br>(0.45-0.93)                                 | 1                   | 1.09<br>(0.90-1.32) | 1.39<br>(1.15-1.67) | 1.77<br>(1.46-2.14) | <0.001                  | 0.034                                                                       |
| BMI18≥21                                                      | 2204  | 0.92<br>(0.74-1.14)                                 | 0.98<br>(0.77-1.25) | 1.14<br>(0.94-1.39) | 1.44<br>(1.18-1.74) | 1.57<br>(1.29-1.91) | <0.001                  |                                                                             |
| <b>ER-</b>                                                    |       |                                                     |                     |                     |                     |                     |                         |                                                                             |
| BMI18<21                                                      | 658   | 1.01<br>(0.52-1.95)                                 | 1                   | 1.19<br>(0.79-1.79) | 1.38<br>(0.92-2.05) | 1.66<br>(1.10-2.49) | <0.001                  | 0.133                                                                       |
| BMI18≥21                                                      | 440   | 0.83<br>(0.52-1.34)                                 | 1.02<br>(0.62-1.69) | 0.97<br>(0.64-1.48) | 1.29<br>(0.85-1.96) | 1.04<br>(0.68-1.61) | 0.205                   |                                                                             |

\* Adjusted for ethnicity (Caucasian, African-American, Hispanic, Asian, others), family history of breast cancer (yes, no), personal history of benign breast disease (yes, no), alcohol consumption (non-drinkers, >0-<5, 5-<15, 15-<30, ≥30 g/d), smoking status (never, past, current), education (<high school, high school, >high school), physical activity (low, medium, high, missing), age at menarche (<11, 11-12, 13-14, ≥15 yrs), height (<1.60, 1.60-<1.65, 1.65-<1.70, 1.70-<1.75, ≥1.75 m), oral contraceptive use (never, ever), energy intake (kcal/d, continuous), interaction between parity (0, 1-2, ≥3) and age of first birth (<30, ≥30 yrs); age at baseline in years and year of questionnaire return were included as stratification variables.

**Table S7. Funding and Acknowledgements for Individual Cohorts**

| <b>Study Name (Acronym)</b>                                           | <b>Funding Sources and Acknowledgements</b>                                                                                                                                                                                                                                                                                                                                                                                                                                                                                                                                                                                               |
|-----------------------------------------------------------------------|-------------------------------------------------------------------------------------------------------------------------------------------------------------------------------------------------------------------------------------------------------------------------------------------------------------------------------------------------------------------------------------------------------------------------------------------------------------------------------------------------------------------------------------------------------------------------------------------------------------------------------------------|
| Beta-Carotene and Retinol Efficacy Trial (CARET)                      | The CARET study was supported by U01 CA063673, R01 CA096789, UM1 CA167462, U01 CA167462.                                                                                                                                                                                                                                                                                                                                                                                                                                                                                                                                                  |
| Breast Cancer Detection Demonstration Project Follow-up Study (BCDDP) | The BCDDP was supported, in part, by the Intramural Research Program of the National Cancer Institute, National Institutes of Health.                                                                                                                                                                                                                                                                                                                                                                                                                                                                                                     |
| California Teachers Study (CTS)                                       | The CTS was supported by R01CA77398, U01CA199277 and UM1 CA169417.                                                                                                                                                                                                                                                                                                                                                                                                                                                                                                                                                                        |
| Canadian National Breast Screening Study (CNBSS)                      | The CNBSS was supported by the Breast Cancer Research Foundation, BCRF-19-140.                                                                                                                                                                                                                                                                                                                                                                                                                                                                                                                                                            |
| Cancer Prevention Study-II Nutrition Cohort (CPS II)                  | The American Cancer Society funded the creation, maintenance and updating of the CPS-II cohort. We acknowledge the contribution to this study from central cancer registries supported through the Centers for Disease Control and Prevention's National Program of Cancer Registries, as well as cancer registries supported by the National Cancer Institute's Surveillance Epidemiology and End Results program. The views expressed here are those of the authors and do not necessarily represent the American Cancer Society or the American Cancer Society – Cancer Action Network.                                                |
| CLUE II: Campaign Against Cancer and Heart Disease (CLUE II)          | Funding for the CLUE II cohort was provided by grants from the National Cancer Institute (U01-CA-086308) and the National Institute on Aging (U01-AG-18033). Cancer incidence data were provided by the Maryland Cancer Registry, Center for Cancer Surveillance and Control, Maryland Department of Health, 201 W. Preston Street, Room 400, Baltimore, MD 21201. We acknowledge the State of Maryland, the Maryland Cigarette Restitution Fund, and the National Program of Cancer Registries of the Centers for Disease Control and Prevention for the funds that support the collection and availability of the cancer registry data. |
| Hormones and Diet in the Etiology of Breast Cancer Study (ORDET)      | This study was supported by the Italian Association for Cancer Research (AIRC).                                                                                                                                                                                                                                                                                                                                                                                                                                                                                                                                                           |
| Iowa Women's Health Study (IWHS)                                      | The IWHS study was funded by a grant from NCI grant R01 CA39742                                                                                                                                                                                                                                                                                                                                                                                                                                                                                                                                                                           |
| Japan Public Health Center-Based Prospective Study Cohort 1 (JPHC I)  | The JPHC study was supported by grants from the National Cancer Center Research and Development Fund (since 2011) and a Grant-in-Aid for Cancer Research from the Ministry of Health, Labour and Welfare of Japan (from 1989 to 2010).                                                                                                                                                                                                                                                                                                                                                                                                    |
| Melbourne Collaborative Cohort Study (MCCS)                           | The MCCS cohort recruitment was funded by VicHealth and Cancer Council Victoria. The MCCS was further augmented by Australian National Health and Medical Research Council grants 209057, 396414 and 1074383 and by infrastructure provided by Cancer Council Victoria.                                                                                                                                                                                                                                                                                                                                                                   |
| Multiethnic Cohort (MEC)                                              | The MEC study was supported by a grant from the National Institutes of Health, National Cancer Institute: R37 CA54281 and U01 CA164973.                                                                                                                                                                                                                                                                                                                                                                                                                                                                                                   |
| Netherlands Cohort Study (NLCS)                                       | The NLCS was supported by grants from the Dutch Cancer Society and World Cancer Research Fund.                                                                                                                                                                                                                                                                                                                                                                                                                                                                                                                                            |
| New York University Women's Health Study (NYUWHS)                     | This work was supported by grants from the National Institutes of Health (R01 CA098661, U01 CA182934 and center grants P30 CA016087 and P30 ES000260).                                                                                                                                                                                                                                                                                                                                                                                                                                                                                    |
| NIH-AARP Diet and Health Study (NIH-AARP)                             | AARP research was supported (in part) by the Intramural Research Program of the National Institutes of Health, National Cancer Institute.                                                                                                                                                                                                                                                                                                                                                                                                                                                                                                 |
| Nurses' Health Study (NHS)                                            | This work was supported by the National Institutes of Health grants UM1 CA186107, R01 CA49449 and P01 CA87969, the Breast Cancer Research Foundation. We would like to thank the following state cancer registries for their help: AL, AZ, AR, CA, CO, CT, DE, FL, GA, ID, IL, IN, IA, KY, LA, ME, MD, MA, MI, NE, NH, NJ, NY, NC, ND, OH, OK, OR, PA, RI, SC, TN, TX, VA, WA, WY. The authors assume full responsibility for analyses and interpretation of these data.                                                                                                                                                                  |

---

**Study Name (Acronym)****Funding Sources and Acknowledgements**

---

Nurses' Health Study II (NHS II)

This work was supported by the National Institutes of Health grants U01 CA176726, R01 CA50385 and the Breast Cancer Research Foundation. We would like to thank the following state cancer registries for their help: AL, AZ, AR, CA, CO, CT, DE, FL, GA, ID, IL, IN, IA, KY, LA, ME, MD, MA, MI, NE, NH, NJ, NY, NC, ND, OH, OK, OR, PA, RI, SC, TN, TX, VA, WA, WY. The authors assume full responsibility for analyses and interpretation of these data.

Prostate, Lung, Colorectal, and Ovarian Cancer Screening Trial USA (PLCO)

The PLCO study was supported by the Intramural Research Program of the Division of Cancer Epidemiology and Genetics and contracts from the Division of Cancer Prevention, National Cancer Institute, National Institutes of Health. The authors thank the PLCO screening center investigators and the staff from Information Management Services, Inc and Westat, Inc.

Swedish Mammography Cohort (SMC)

The SMC study was supported by grants from the Swedish Research Council and the Swedish Cancer Foundation.

Women's Health Study (WHS)

The WHS was supported by grants from the National Institutes of Health (CA047988, HL043851, HL080467, HL099355, CA182913).

Women's Lifestyle and Health Study (WLHS)

The WLHS was funded by Swedish Research Council (Vetenskapsrådet) grant K2012-69X-22062-01-3 and by the Swedish Cancer Society

---
